# Supplementary material for: Recycling waste sources into nanocomposites of graphene materials: Overview from an energy-focused perspective
Source: publisher site journal article supplement (doi:10.1515/ntrev-2022-0512), 2023-01-01
Supplement: Supplementary file 1 [file Supporting_Information_Ikram_etal.xlsx]

## Sheet: Munka1
SUPPORTING INFORMATION
Recycling waste sources into nanocomposites of graphene materials: overview from an energy-focused perspective
Rabia Ikram1*, Badrul Mohamed Jan1, Péter Nagy2, Tamas Szabo2*
1Department of Chemical Engineering, University of Malaya, 50603, Kuala Lumpur, Malaysia
2Department of Physical Chemistry and Materials Science, University of Szeged, Rerrich Béla tér 1, H-6720, Szeged, Hungary
*********************************************************************************************************************************************************************************************************************************************	**********************************************	****	************************************	*******************************************
LIST OF PUBLICATIONS INCLUDED IN THE STATISTICAL ANALYSIS
Title	Source	Year	Application	DOI
Functionalised graphene effect on the mechanical and thermal properties of recycled PA6/PA6,6 blends	polymer waste	2021	structural material/mechanical propeties	10.1177/0021998320987897
Coal Fly Ash Decorated with Graphene Oxide-Tungsten Oxide Nanocomposite for Rapid Removal of Pb2+ Ions and Reuse of Spent Adsorbent for Photocatalytic Degradation of Acetaminophen	Coal fly ash waste	2021	adsporption/photocatalytic	10.1021/acsomega.0c04194
Lanthanum oxide-graphene oxide coated functionalized pyrolyzed biomass from sawdust and its application for dye removal present in solution	Sawdust waste	2021	VUV photocatalyst	10.1007/s13399-021-01507-9
Experimental and Numerical Investigation of Flow and Alignment Behavior of Waste Tire-Derived Graphene Nanoplatelets in PA66 Matrix during Melt-Mixing and Injection	Tire waste	2021	structural material/mechanical propeties	10.3390/polym13060949
Graphene oxide-coated pyrolysed biochar from waste sawdust and its application for treatment of cadmium-containing solution: batch, fixed-bed column, regeneration, and mathematical modelling	Sawdust waste	2021	adsorbent	10.1007/s13399-020-01153-7
A waste corn cob core-derived SiO2 @ graphene-like carbon nanocomposite and its application in lithium-ion battery	Corn cob waste	2021	battery	10.1007/s10854-020-04901-7
Cellulose supported bismuth vanadate nanocomposite for effective removal of organic pollutant	Agro waste cellulose	2020	photocatalyst	10.1016/j.jece.2020.104027
An investigation on kinetic and thermodynamic parameters of methylene blue adsorption onto graphene-based nanocomposite	Dry battery waste	2020	adsorbent	10.1016/j.chemphys.2020.110793
Metal-free keratin modified poly(pyrrole-co-aniline)-reduced graphene oxide based nanocomposite materials: A promising cathode catalyst in microbial fuel cell application	Waste hair keratin	2020	fuel cells	10.1016/j.jece.2020.103813
A Sustainable Route to Synthesize Graphene Oxide/Ordered Mesoporous Carbon as Effect Nanocomposite Adsorbent	Rice husk waste	2020	adsorbent	10.1166/jnn.2020.17450
Development of waste tire-derived graphene reinforced polypropylene nanocomposites with controlled polymer grade, crystallization and mechanical characteristics via melt-mixing	Tire waste	2020	structural material/mechanical propeties	10.1002/pi.6012
A sustainable approach to scalable production of a graphene based flame retardant using waste fish deoxyribonucleic acid	Fish waste	2019	flame retardant	10.1016/j.jclepro.2019.119150
Photocatalytic, antibacterial, and deodorization activity of recycled triacetate cellulose nanocomposites	waste triacetate cellulose TAC film	2019	photocatalyst	10.1016/j.matchemphys.2019.122260
Preparation and characterization of graphene oxide from tea waste and it's photocatalytic application of TiO2/graphene nanocomposite	Tea waste	2020	photocatalyst	10.1088/2053-1591/ab689d
Tree Gum-Graphene Oxide Nanocomposite Films as Gas Barriers	Tree gum waste	2019	gas barriers	10.1021/acsanm.9b02166
Valorization of sugarcane straw to produce highly conductive bacterial cellulose/graphene nanocomposite films through in situ fermentation: Kinetic analysis and property evaluation	Sugarcane waste	2020	conductive material	10.1016/j.jclepro.2019.117859
Waste Eggshells for the Decoration of Carbon Nanotubes and Graphene Nanosheets with Hydroxyapatite for Preparation of LLDPE Nanocomposites	Eggshells waste	2019	flame retardant/structural material	10.1007/s10924-019-01501-3
Development of a novel three-dimensional microfluidic paper-based analytical device (3D-mu PAD) for chlorpyrifos detection using graphene quantum-dot capped gold nanocomposite for colorimetric assay	Rubber waste	2019	fabrication of microanalytical devices	10.1080/03067319.2019.1650921
Enhanced visible light photocatalysis with E‐waste‐based V2O5/zinc–ferrite: BTEX degradation and mechanism	E-waste	2020	photocatalyst	10.1002/jctb.6442
E-Waste Based V2O5/RGO/Pt Nanocomposite for Photocatalytic Degradation of Oxytetracycline	E-waste	2019	photocatalyst	10.1002/ep.13123
N-doped 3D porous carbon-graphene/polyaniline hybrid and N-doped porous carbon coated gC(3)N(4) nanosheets for excellent energy density asymmetric supercapacitors	bio-waste Bombax malabaricum seeds	2019	supercapacitor	10.1016/j.electacta.2019.03.043
Preparation of graphene oxide and alkali lignin nanohybrids and its application to reinforcing polymer	Lignin waste	2019	structural material/mechanical propeties	10.1007/s00226-019-01094-z
A Green Approach for the Synthesis of Coconut Husk Ash Twisted Graphene Nanocomposites: Novel Catalysts for Solvent-Free Biginelli Reaction	Coconut waste	2019	catalysis	10.1002/slct.201803352
Synergistic impact of graphene and carbon nanotubes on waste paper for hybrid nanocomposite substrates	Waste paper	2019	structural materialconductive material	10.1007/s10570-019-02339-7
Facile synthesis of graphene-tin oxide nanocomposite derived from agricultural waste for enhanced antibacterial activity against Pseudomonas aeruginosa	Agriculture waste	2019	antibanterial film	10.1038/s41598-019-40916-9
Eco-Friendly In Situ Fabrication of Reduced Graphene Oxide Gold Nanocomposites for Catalysis and Dye Degradation	Peanut peel waste	2018	catalysis	10.1134/S003602441813023X
Polypropylene nanocomposites with electrical and magnetic properties	Plastic and sawdust	2018	magnetic/conductive material	10.1002/app.46820
Effect of graphene oxide on thermal stability of aerogel bio-nanocomposite from cellulose-based waste biomass	Cellulose waste	2018	structural material	10.1007/s10570-018-1946-5
Biodegradable Transparent Substrate Based on Edible Starch-Chitosan Embedded with Nature-Inspired Three-Dimensionally Interconnected Conductive Nanocomposites for Wearable Green Electronics	E-waste	2018	conductive material	10.1021/acsami.8b04291
Fabrication of strong nanocomposite films with renewable forestry waste/montmorillonite/reduction of graphene oxide for fire retardant	Foresty waste	2018	Fire retardant	10.1016/j.cej.2017.12.119
A novel approach to iron oxide separation from e-waste and bisphenol A detection in thermal paper receipts using recovered nanocomposites	E-waste	2018	sensor material	10.1039/C8RA08017H
Application of multi-functional chestnut shell in one-step preparing Fe3O4@C magnetic nanocomposite with high adsorption performance	Chestnut shell waste	2018	adsorbent	10.1080/1536383X.2018.1448792
Environment-benign synthesis of rGO/MnOx nanocomposites with superior electrochemical performance for supercapacitors	Manganese waste	2017	supercapacitor	10.1016/j.jallcom.2017.09.115
Self-assembled polyaniline nanowires stippled graphene-3-pentadecylphenyl phosphate hybrid nanocomposite based green sustainable electrodes for supercapacitors	3-PDPP, a waste byproduct from the cashew industry	2017	supercapacitor	10.1039/C7TA05215D
Polyaniline silver nanoparticle coffee waste extracted porous graphene oxide nanocomposite structures as novel electrode material for rechargeable batteries	Coffee waste	2017	batteries	10.1088/2053-1591/aa5ece
Supramolecular Assembly of Biobased Graphene Oxide Quantum Dots Controls the Morphology of and Induces Mineralization on Poly(epsilon-caprolactone) Films	Paper waste nanocomposites	2015	sturctural material	10.1021/acs.biomac.5b01339
Synthesis and analysis of injection-molded nanocomposites of recycled high-density polyethylene incorporated with graphene nanoflakes	Plastic waste	2014	structural/conductive material	10.1002/pc.23063
Facile Preparation of MnO2/Graphene Nanocomposites with Spent Battery Powder for Electrochemical Energy Storage	Spent battery powder	2014	supercapacitor	10.1021/acssuschemeng.5b00305
Bamboo leaf derived ultrafine Si nanoparticles and Si/C nanocomposites for high-performance Li-ion battery anodes	Bamboo leaves	2015	batteries	10.1039/C5NR02578H
Keratin-polyethylene oxide bio-nanocomposites reinforced with ultrasonically functionalized graphene	Poultry feather waste	2015	structural material	10.1039/C5RA12402F
Green, low-cost synthesis of photoluminescent carbon dots by hydrothermal treatment of willow bark and their application as an effective photocatalyst for fabricating Au nanoparticles-reduced graphene oxide nanocomposites for glucose detection	Willow bark waste	2013	photocatalyst	10.1039/C2CY20635H
Facile synthesis of three-dimensional chitosan-graphene mesostructures for reactive black 5 removal	waste sugarcane bagasse	2012	adsorbent	10.1016/j.carbpol.2011.11.065
Keratin-Graphene Nanocomposite: Transformation of Waste Wool in Electronic Devices	wool waste	2019	electronic devices	10.1021/acssuschemeng.9b02415
Utilization of rice husk wastes in synthesis of graphene oxide-based carbonaceous nanocomposites	rice husk	2020	adsorbent	10.1016/j.wasman.2020.04.029
Utilization of metallurgical waste for the preparation of photocatalytically active composites based on ZnO–graphene oxide	metallurgical waste	2021	photocatalyst	10.1021/jp2113329
Self-assembled oil palm biomass-derived modified graphene oxide anode: An efficient medium for energy transportation and bioremediating Cd (II) via microbial fuel cells	oil palm waste	2021	fuel cells	10.1016/j.arabjc.2021.103121
Preparation of Shape-Stabilized Phase Change Material by the Valorization of Oil Palm Waste: Reduced Graphene Oxide-activated Carbon Derived Carbon Matrix for Thermal Energy Storage	oil palm waste	2021	thermal energy storage	10.15376/biores.16.1.96-117
Graphene-coffee waste derived carbon composites as electrodes for optimized lithium ion capacitors	coffee waste	2020	batteries	10.1016/j.carbon.2020.02.052
Graphene oxide–Based supercapacitors from agricultural wastes: A step to mass production of highly efficient electrodes for electrical transportation systems	agricultural waste	2020	supercapacitor	10.1016/j.renene.2019.11.072
Biomass waste-carbon/reduced graphene oxide composite electrodes for enhanced supercapacitors	biomass	2019	supercapacitor	10.1016/j.electacta.2018.12.160
Graphene-like porous carbon nanostructure from Bengal gram bean husk and its application for fast and efficient adsorption of organic dyes	biomass	2019	adsorbent	10.1016/j.apsusc.2019.01.138
The inhibitory impacts of nano-graphene oxide on methane production from waste activated sludge in anaerobic digestion	waste sludge	2019	adsorbent	10.1016/j.scitotenv.2018.07.424
One-step formation of silicon-graphene composites from silicon sludge waste and graphene oxide via aerosol process for lithium ion batteries	silicon sludge waste	2016	batteries	10.1038/srep33688
In-situ formation of Al 2 O 3 /Al core-shell from waste material: Production of porous composite improved by graphene	aluminium waste	2018	structural/conductive material	10.1016/j.ceramint.2018.03.040
Fabrication of calcium hydroxyapatite incorporated polyurethane-graphene oxide nanocomposite porous scaffolds from poly (ethylene terephthalate) waste: A green route toward bone tissue engineering	plastic waste	2020	structural material	10.1016/j.polymer.2020.122436
Polyaniline silver nanoparticle coffee waste extracted porous graphene oxide nanocomposite structures as novel electrode material for rechargeable batteries	coffee waste	2017	batteries	10.1088/2053-1591/aa5ece
Effective Elimination of Contaminant Antibiotics Using High-Surface‑Area Magnetic‑Functionalized Graphene Nanocomposites Developed from Plastic Waste	plastic waste	2020	adsorption	10.3390/ma13071517
Dye degradation studies using immobilized pristine and waste polystyrene-TiO2/rGO/g-C3N4 nanocomposite photocatalytic film in a novel airlift reactor under solar light	plastic waste	2019	photocatalyst	10.1016/j.jece.2019.103289
Chemically reduced graphene oxide (CRGO) from waste batteries and morphological assessment of CRGO/methyl cellulose transdermal film	battery waste	2020	drug derivery	10.1016/j.nanoso.2020.100454
Mechanical properties of poly (lactic acid) compounded with recycled tyre waste/graphene nanoplatelets nanocomposite	tyre waste	2021	structural material	10.1016/J.MATPR.2021.01.498
Green fabrication of graphene-based silver nanocomposites using agro-waste for sensing of heavy metals	biomass	2017	sensor material	10.1007/s11164-016-2844-9
Graphene oxide functionalized chitosan-magnetite nanocomposite for removal of Cu(II) and Cr(VI) from waste water	biomass	2020	adsorption	10.1016/j.ijbiomac.2020.09.059
Electromagnetic properties of Carbon-Graphene Xerogel, Graphite and Ni-Zn Ferrite composites in polystyrene matrix in the X-Band (8.2-12.4 GHz)	paper industry waste (black liqour)	2021	EMI shielding	10.1590/S1517-707620210002.1267
Characterization of graphene/pine wood biochar hybrids: Potential to remove aqueous Cu2+	pine wood (biomass)	2021	adsorption	10.1016/j.envres.2020.110283
Green synthesis of Cu nanoparticles supported on straw-graphene composite for catalytic reduction of p-nitrophenol	straw (biomass)	2021	catalysis	10.1016/j.jclepro.2020.124578
Experimental investigation for the influence of graphene oxide on properties of the cement-waste concrete powder composite	cement	2021	structural material	10.1016/j.conbuildmat.2020.122229
Influence of cellulosic and non-cellulosic particle fillers on mechanical, dynamic mechanical, and thermogravimetric properties of waste cotton fibre reinforced green composites	cotton waste	2021	structural materials	10.1016/j.compositesb.2020.108595
Studies on combined effects of graphene oxide-fly ash hybrid on the workability, mechanical performance and pore structures of cementitious grouting under high W/C ratio	fly ash (biomass)	2021	structural materials	10.1016/j.conbuildmat.2021.122578
Bio-waste-derived few-layered graphene/SrTiO3/PAN as efficient photocatalytic system for water splitting	rice husk (biomass)	2021	photocatalisys	10.1016/j.apsusc.2021.149176
Paradisiaca/Solanum Tuberosum Biowaste Composited with Graphene Oxide for Flexible Supercapacitor	plant waste (biomass)	2021	supercapacitor	10.14447/jnmes.v24i1.a04
Utilization of Rice Husk Ash in the Preparation of Graphene-Oxide-Based Mesoporous Nanocomposites with Excellent Adsorption Performance	rice husk (biomass)	2021	adsorption	10.3390/ma14051214
Flash graphene from rubber waste	rubber waste	2021	structural material	10.1016/j.carbon.2021.03.020
An efficient and eco-friendly route to prepare graphene nanosheet and its effect on the flammability of polypropylene composites	Biomass	2021	Fire retardant	10.1002/pat.5332
Thermal, mechanical, rheological, electrical and electromagnetic interference shielding performance of polypropylene/magnetic carbon nanocomposites	Biomass	2021	EMI shielding	10.1016/j.jece.2021.105447
From Waste to Functional Materials: A Multifunctional Electromagnetic Interference Shielding Composite from Waste Rock Wool	Rock wool waste	2021	EMI shielding	10.1021/acsaelm.1c00169
Facile synthesis of boron-doped graphene-silicon conductive network composite from recycling silicon for Lithium-ion batteries anodes materials	Si waste sludge	2021	Li battery	10.1016/j.matlet.2021.129875
Preparation and oil absorption performance of polyacrylonitrile / reduced graphene oxide composite porous material	Plastic waste	2021	adsorption	10.1016/j.jwpe.2021.102092
A new strategy for functionalization of char derived from pyrolysis of textile waste and its application as hybrid fillers (CNTs/char and graphene/ char) in cement industry	Textile waste	2021	structural material	10.1016/j.jclepro.2021.128058
Synthesis dielectric and mechanical properties of paddy straw derived graphene quantum dots-stone waste nanocomposite	Paddy straw (biomass)	2021	structural material	10.1016/j.matlet.2021.130323
Ultrasonic spray deposition of WO3-rGO thin-film composite for photocatalytic degradation of methylene blue	Battery waste	2021	photocatalisys	10.1016/j.ijleo.2021.167593
Porous Nano-Ni/Graphene/Loofah Composites for Electromagnetic Interference Shielding	Biomass	2022	EMI shielding	10.1007/s40684-021-00375-y
Analysis of mechanical properties of Al-based metal matrix composite reinforced with ES and RHA	Biomass	2021	structural material	10.1108/WJE-02-2021-0079
Phase change materials confined into sunlight capturer sponge towards thermal energy harvesting and storage	Plastic waste	2021	thermal storage material	10.1016/j.solener.2021.08.039
Nanostructured Carbon Composites from Cigarette Filter Wastes and Graphene Oxide Suitable as Electrodes for 3.4 V Supercapacitors	Cigarette filter waste	2021	supercapacitor	10.1002/batt.202100134
Tribological performance of aluminium hybrid self-lubricating composites reinforced with green synthesized graphene	Biomass	2021	structural material	10.1088/2053-1591/ac2772
Development of Waste Polystyrene-Based Copper Oxide/Reduced Graphene Oxide Composites and Their Mechanical, Electrical and Thermal Properties	Plastic waste	2021	structural material	10.3390/nano11092372
A Facile Approach of Fabricating Electrically Conductive Knitted Fabrics Using Graphene Oxide and Textile-Based Waste Material	Textile waste	2021	Conductive material	10.3390/polym13173003
Millisecond Conversion of Photovoltaic Silicon Waste to Binder-Free High Silicon Content Nanowires Electrodes	Si waste	2021	Li-ion battery	10.1002/aenm.202102103
Facile synthesis of carbon quantum dot -carbon nanotube composites on an eggshell-derived catalyst by one-step chemical vapor deposition	Eggshell	2021	Catalysis	10.1016/j.diamond.2021.108657
Pre-concentration of organophosphorus pesticides in aqueous environments and food extracts by modified magnetic graphene oxide synthesized from sugar beet bagasse waste	Sugar beet bagasse	2021	adsorbent	10.1007/s12161-021-02143-9
Nanocomposites of Chitosan/Graphene Oxide/Titanium Dioxide Nanoparticles/Blackberry Waste Extract as Potential Bone Substitutes	Blackberry waste (biomass)	2021	bone tissue engineering	10.3390/polym13223877
PROPORTIONAL EFFECT IN SbSi/N-DOPED GRAPHENE NANOCOMPOSITE PREPARATION FOR HIGH-PERFORMANCE LITHIUM-ION BATTERIES	rice husk (biomass)	2021	Li-ion battery	10.1142/S0218625X21501055
Valorization of Biomass Pulping Waste as Effective Additive for Enhancing the Performance of Films Based on Liquid Crystal Hydroxypropyl-Cellulose Nanocomposites	Sugarcane bagasse (biomass)	2022	Structural material	10.1007/s12649-021-01631-7
Iron-graphene based anode material for rechargeable lithium-ion batteries decorated by gold nanoparticles recovered from gold plated waste surgical tools	Waste surgical tools	2021	Li-ion battery	10.1016/j.surfin.2021.101575
Construction of nickel nanoparticles embedded in nitrogen self-doped graphene-like carbon derived from waste grapefruit peel for multifunctional OER, HER, and magnetism investigations	Grapefruit peel waste (biomass)	2021	catalysis	10.1016/j.jece.2021.106894
Preparation of Graphene Oxide/Cellulose Composites with Microcrystalline Cellulose Acid Hydrolysis Using the Waste Acids Generated by the Hummers Method of Graphene Oxide Synthesis	Hummers acid waste	2021	Structural material	10.3390/polym13244453
Enhanced Performance of PVDF Composite Ultrafiltration Membrane via Degradation of Collagen-Modified Graphene Oxide	Leather waste	2021	Ultrafiltration	10.3390/app112311513
Waste biomass-assisted synthesis of TiO2 and N/O-contained graphene- like biochar composites for enhanced adsorptive and photocatalytic performances	Peanut shell (biomass)	2022	photocatalisys	10.1016/j.jallcom.2021.163287
Antioxidant analysis of ultra-fast selectively recovered 4-hydroxy benzoic acid from fruits and vegetable peel waste using graphene oxide based molecularly imprinted composite	Biomass	2021	adsorption	10.1016/j.foodchem.2021.131926
KW-GO, a graphene-like carbon extracted from kitchen waste (KW) advances the hydrogen production of V2O5	Biomass	2022	photocatalisys	10.1016/j.ijhydene.2021.11.093
Effect of graphene oxide/hydroxyapatite nanocomposite on osteogenic differentiation and antimicrobial activity	Eggshell waste	2022	Antibacterial coating	10.1016/j.surfin.2021.101683
Development of waste rice husk/PVC/GO nanocomposite using TA-CaO adduct and ESO as green additives	rice husk (biomass)	2022	structural material	10.1177/08927057211063398
Enhancement in lithium storage performances of SiO2/graphene-based nanocomposites prepared by low cost and facile approach	rice husk (biomass)	2022	Li-ion battery	10.1007/s10854-022-07828-3
Vanadium pentaoxide-doped waste plastic-derived graphene nanocomposite for supercapacitors: a comparative electrochemical study of low and high metal oxide doping	Plastic waste	2022	supercapacitor	10.1039/d1ra07458j
Corn Stalk-Based Carbon Microsphere/Reduced Graphene Oxide Composite Hydrogels for High-Performance Symmetric Supercapacitors	Corn stalk waste (biomass)	2022	supercapacitor	10.1021/acs.energyfuels.2c00073
Development of recycled disposable mask based polypropylene matrix composites: Microwave self-healing via graphene nanoplatelets	disposable mask (plastic waste)	2022	structural material	10.1016/j.susmat.2022.e00389
Two-step electrodeposition of Hausmannite sulphur reduced graphene oxide and cobalt-nickel layered double hydroxide heterostructure for high-performance supercapacitor	Chicked bone waste (biomass)	2022	supercapacitor	10.1002/er.7922
Modification of Asphalt Modified by Packaging Waste EVA and Graphene Oxide	Plastic waste	2022	structural material	10.3389/fmats.2022.833593
Preparation of photoluminescent and anticorrosive epoxy paints immobilized with nanoscale graphene from sugarcane bagasse agricultural waste	Biomass	2022	Paints (coatings)	10.1007/s11356-022-20111-6
Distinguished performance of biogenically synthesized reduced-graphene-oxide-based mesoporous Au-Cu2O/RGO ternary nanocomposites for sonocatalytic reduction of nitrophenols in water	Biomass	2022	catalysis	10.1039/D2NJ00745B
A waste-derived nanocomposite sealant for repairing micro-cracks in concrete	chitosan (biomass)	2022	structural material	10.1016/j.jobe.2021.103965
Green Synthesis of a Reduced-Graphene-Oxide Wrapped Nickel Oxide Nano-Composite as an Anode For High-Performance Lithium-Ion Batteries	Biomass	2022	Li-ion battery	10.1002/slct.202200676
Unraveling the role of agro waste-derived graphene quantum dots on dielectric and mechanical property of the fly ash based polymer nanocomposite	Biomass	2022	structural material	10.1016/j.jallcom.2022.163953
Industrial molasses waste in the performant synthesis of few-layer graphene and its Au/Ag nanoparticles nanocomposites. Photocatalytic and supercapacitance applications	Biomass	2022	supercapacitor	10.1016/j.jclepro.2022.131540
Functionalized graphene oxide/activated carbon from canola waste as sustainable nanomaterials to improve pseudocapacitance performance of the electroactive conductive polymer	Canola (biomass)	2022	supercapacitor	10.1016/j.est.2022.104279
Application of reduced graphene oxide as the hole transport layer in organic solar cells synthesized from waste dry cells using the electrochemical exfoliation method	Battery waste	2022	Solar cell	10.1039/D2NJ01974D
Upcycling waste mask PP microfibers in portland cement paste: Surface treatment by graphene oxide	Plastic waste	2022	structural material	10.1016/j.matlet.2022.132238
Corn husk multilayered graphene/ZnO nanocomposite materials with enhanced photocatalytic activity for organic dyes and doxycycline degradation	Corn husk waste (biomass)	2022	photocatalisys	10.1016/j.materresbull.2022.111800
A novel green composite conductive material enhancing anaerobic digestion of waste activated sludge via improving electron transfer and metabolic activity	Biomass	2022	Conductive material	10.1016/j.watres.2022.118687
Fabrication of Al/Al2O3/ SiC/graphene hybrid nanocomposites from Al-dross by powder metallurgy: Sinterability, mechanical and electrical properties	Al waste	2022	structural material	10.1016/j.ceramint.2022.04.084
*********************************************************************************************************************************************************************************************************************************************	**********************************************	****	***********************************	******************************************
RECENT PUBLICATIONS (published after 2022 July)
Bio-waste derived, phosphorus decorated composite for highly efficient flame retardant for cotton fabric	Biomass	2022	Flame retardant	10.1007/s10570-022-04783-4
Multifunctional PA6 composites using waste glass fiber and green metal organic framework/graphene hybrids	Biomass	2022	structural material	10.1002/pc.27002
Synthesis of biowaste derived ultra-light spongy material for the studies of effective removal of oil, organic solvent and selective dye pollutant from waste stream	Biomass	2022	adsorbent	10.1016/j.bcab.2022.102426
A nitrogen-doped amorphous/graphitic hybrid carbon material derived from a sustainable resource for low-cost K-ion battery anodes	Biomass	2022	Battery	10.1039/d2ta04195b
Gas sensing performance of biomass carbon materials promoted by nitrogen doping and p-n junction	Biomass	2022	Gas sensor	10.1016/j.apsusc.2022.153254
Graphene-Wine Waste Derived Carbon Composites for Advanced Supercapacitors	Biomass	2022	Supercapacitor	10.3390/chemengineering6040049
Sugar molasses as a sustainable precursor for the synthesis of graphene sand composite adsorbent for tetracycline and methylene blue removal	Biomass	2022	Adsorbent	10.1007/s11356-022-21996-z
Synergistic Mechanism of Photocatalysis and Photo-Fenton by Manganese Ferrite and Graphene Nanocomposite Supported on Wood Ash with Real Sunlight Irradiation	Biomass	2022	Photocatalisys	10.3390/catal12070745
A Mesoporous Faujasite Prepared by Space-Confined Method for Highly Effective Selectivity of Copper Ions	Si-Li metal waste	2022	Adsorbent	10.3390/w14132040
Amino-functionalized graphene oxide supported in charcoal from the gasification of furniture scraps: From one-pot synthesis to wastewater remediation	Biomass	2022	Adsorbent	10.1016/j.cherd.2022.02.006
